# Supplementary material for: An efficient extraction device for microplastics in marine sediments and its applications
Source: RSC Adv. 2024 Nov 8;14(48):35610–7. doi: 10.1039/d4ra04347b (PMC11544592; doi:10.1039/d4ra04347b)
Supplement: RA-014-D4RA04347B-s001 [file RA-014-D4RA04347B-s001.xlsx]

## Sheet: Sheet1
table S1 Effect of metal perforated plate packing on microplastic recovery rate
Time	125	250	350	450	500
min	m2/m3	m2/m3	m2/m3	m2/m3	m2/m3
1	46.7	60	53.3	56.7	40
3	80	86.7	90	73.3	56.7
5	86.7	100	100	86.7	73.3
7	93.3	100	100	90	93.3
9	96.7	100	100	100	100
